# Supplementary material for: GT‐rich promoters can drive RNA pol II transcription and deposition of H2A.Z in African trypanosomes
Source: PubMed Central journal article supplement (PMC5579346; doi:10.15252/embj.201695323), 2017-07-12
Supplement: EMBJ-36-2581-s007.pdf [file EMBJ-36-2581-s007.pdf]

**Table EV1: List of TSR translocation constructs, the source coordinates of the translocated sequences and oligonucleotides for amplification and insertion.**

| <b>construct</b> | <b>source coordinates</b>   | <b>forward primer sequence 5'-3'</b>                                           | <b>reverse primer sequence 5'-3'</b>                 |
|------------------|-----------------------------|--------------------------------------------------------------------------------|------------------------------------------------------|
| pCW24v2_regA     | Tb427_10_v5:800,949-810,167 | <u>CCGGTACGGGAGATCTCCCTATAGTGAG</u><br>TCGTATTAATCAAGTTTAGCCCGTTTACC<br>TCCA   | <u>ACTGATAGGGAGATCTAGCTCAGCAGTA</u><br>ATAAGGGTCA    |
| pCW24v2_regA1    | Tb427_10_v5:800,949-802,743 | <u>CCGGTACGGGAGATCTCCCTATAGTGAG</u><br>TCGTATTAATCAAGTTTAGCCCGTTTACC<br>TCCA   | <u>ACTGATAGGGAGATCTGCGGACACGGAT</u><br>TAGCTGAA      |
| pCW24v2_regA2    | Tb427_10_v5:802,251-804,045 | <u>CCGGTACGGGAGATCTCCCTATAGTGAG</u><br>TCGTATTAATCAAAAGGCGTATGTCCACT<br>GGG    | <u>ACTGATAGGGAGATCTAGGTGTAAGGAA</u><br>AAACTGAATGAGA |
| pCW24v2_regA3    | Tb427_10_v5:803,552-805,345 | <u>CCGGTACGGGAGATCTCCCTATAGTGAG</u><br>TCGTATTAATCAGGCCCTTTGGTTACCCA<br>CTT    | <u>ACTGATAGGGAGATCTTCCCACCGTGAG</u><br>TTAAACCAG     |
| pCW24v2_regA4    | Tb427_10_v5:804,859-806,648 | <u>CCGGTACGGGAGATCTCCCTATAGTGAG</u><br>TCGTATTAATCACAAAATTATGGTGCACG<br>TACGGT | <u>ACTGATAGGGAGATCTTACTTCTAGGTG</u><br>GGGCTCCC      |
| pCW24v2_regA5    | Tb427_10_v5:806,150-807,942 | <u>CCGGTACGGGAGATCTCCCTATAGTGAG</u><br>TCGTATTAATCAGCAACGTCTCCTTCGCT<br>CTT    | <u>ACTGATAGGGAGATCTAGCCAAGAGGTT</u><br>TGTGGTTCA     |
| pCW24v2_regA6    | Tb427_10_v5:807,455-809,249 | <u>CCGGTACGGGAGATCTCCCTATAGTGAG</u><br>TCGTATTAATCAGGCACCCAACTGCTGA<br>AAG     | <u>ACTGATAGGGAGATCTGCAAATGCATA</u><br>CGCTCGGT       |
| pCW24v2_regA7    | Tb427_10_v5:808,751-        | <u>CCGGTACGGGAGATCTCCCTATAGTGAG</u>                                            | <u>ACTGATAGGGAGATCTAGCTCAGCAGTA</u>                  |

|                 |                                     |                                                                                        |                                                         |
|-----------------|-------------------------------------|----------------------------------------------------------------------------------------|---------------------------------------------------------|
|                 | 810,167                             | TCGTATTAATCACGAGGCTTTTGCTAAGA<br>GGGT                                                  | ATAAGGGTCA                                              |
| pCW24v2_regA2rc | Tb427_10_v5:802,251-<br>804,045     | <u>CCGGTACGGGAGAT</u> CCCCTATAGTGAGT<br>CGTATTAATCAAGATCTAGGTGTAAGGAA<br>AAACTGAATGAGA | <u>ACTGATAGGGAGATCT</u> AAAGGCGTATGT<br>CCACTGGG        |
| pCW24v2_regB    | Tb427_10_v5:1,634,96<br>0-1,641,653 | <u>CCGGTACGGGAGAT</u> CTCCCTATAGTGAG<br>TCGTATTAATCACCCGGAAAGTGATGAG<br>GGAG           | <u>ACTGATAGGGAGATCT</u> AAAACAATATTTT<br>TCTTCGTCAGCGT  |
| pCW24v2_regB1   | Tb427_10_v5:1,634,96<br>0-1,636,762 | <u>CCGGTACGGGAGAT</u> CTCCCTATAGTGAG<br>TCGTATTAATCACCCGGAAAGTGATGAG<br>GGAG           | <u>ACTGATAGGGAGATCT</u> CTTATCTGTCCA<br>CCAATAGAGTATTTT |
| pCW24v2_regB2   | Tb427_10_v5:1,636,26<br>7-1,638,057 | <u>CCGGTACGGGAGAT</u> CTCCCTATAGTGAG<br>TCGTATTAATCAGAACGCTAACCCTCCT<br>CG             | <u>ACTGATAGGGAGATCT</u> GTGGGACAAACA<br>CGGTCACT        |
| pCW24v2_regB3   | Tb427_10_v5:1,637,57<br>1-1,639,366 | <u>CCGGTACGGGAGAT</u> CTCCCTATAGTGAG<br>TCGTATTAATCAGGAGTACTAAAGTGCTG<br>CGGA          | <u>ACTGATAGGGAGATCT</u> GCAAAGAAGACC<br>ATTCGTCAACA     |
| pCW24v2_regB4   | Tb427_10_v5:1,638,86<br>7-1,640,655 | <u>CCGGTACGGGAGAT</u> CTCCCTATAGTGAG<br>TCGTATTAATCATACTCCTTTTGCTTGCG<br>GCG           | <u>ACTGATAGGGAGATCT</u> CACTCATTTCATA<br>ACCGGTCCG      |
| pCW24v2_regB5   | Tb427_10_v5:1,640,19<br>4-1,641,653 | <u>CCGGTACGGGAGAT</u> CTCCCTATAGTGAG<br>TCGTATTAATCATTGTTCTTTGATCAAAA<br>GTGTACGT      | <u>ACTGATAGGGAGATCT</u> AAAACAATATTTT<br>TCTTCGTCAGCGT  |
| pCW24v2_regB1rc | Tb427_10_v5:1,636,26<br>7-1,638,057 | <u>GTATTAATCAAGATCT</u> CTTATCTGTCCAC<br>CAATAGAGTATTTT                                | <u>ACTGATAGGGAGATCT</u> CCCGGAAAGTGA<br>TGAGGGAG        |

underscored sequences indicate InFusion overhangs
