# Supplementary material for: GT‐rich promoters can drive RNA pol II transcription and deposition of H2A.Z in African trypanosomes
Source: PubMed Central journal article supplement (PMC5579346; doi:10.15252/embj.201695323), 2017-07-12
Supplement: EMBJ-36-2581-s008.pdf [file EMBJ-36-2581-s008.pdf]

**Table EV2: List of synthesized DNA sequences to generate constructs containing GT-rich promoters or their reverse complement sequence.**

| sequence name             | DNA sequence 5'-3'                                                                                                                                                                                                                                                                                                                                                                                                                                      |
|---------------------------|---------------------------------------------------------------------------------------------------------------------------------------------------------------------------------------------------------------------------------------------------------------------------------------------------------------------------------------------------------------------------------------------------------------------------------------------------------|
| <b>pCW24v2 background</b> |                                                                                                                                                                                                                                                                                                                                                                                                                                                         |
| GT_210_nt                 | <u>GTATTAATCAAGATCTGTGTGTGTGGT</u> GCTTTTTTCGTCTTTTTTGTGTGTGGGGCGAAGAAAATGTTTGTGTGT<br>TCTTTCTCCCGTGTGTGTGCTTCCCCCTTTGTGCGTGCGTAGGGGGAGAGTTCCCCCTTTGGGGGGAAACTGTG<br>TGTGGGGTTTGTGTGTGGGTGCGGGGGGGAAACTTTGTTTTGTCGGTGGTGTGTGTGTGGAGGGTTGTTG<br>TTGGCGCGCCTACGGCCGGCC <u>GATCTCCCTATCAGT</u>                                                                                                                                                             |
| GT_206_nt                 | <u>GTTGTTGTTGGCGCGCCGCGTGTGTGTAATGTTTTTGGGGGGGGAGTTTATTTTTGGTGGGTGGTGGTGTGT</u><br>GTGTGCGTGCGTGTGTGTGTGTGTTTTGGGGGGGGTTTTCCCCCTTTGTTGCTGCTGTTTTTTGTTCCCCCTCCCCTGTG<br>TGTGTGTGTGTTTTGTGCCTTTTCTTGTTGTGTGTGCCCCCTCCCCTGTTTTTTGTGTTTGTGTGGCCGG <u>CCGA</u><br><u>TCTCCCTATCA</u>                                                                                                                                                                         |
| fused GT_416_nt           | GTGTGTGTGGTGTCTTTTTTCGTCTTTTTTGTGTGTGGGGCGAAGAAAATGTTTGTGTGTCTTTCTCCCGTGTGT<br>GTGCTTCCCCCTTTGTGCGTGCGTAGGGGGAGAGTTCCCCCTTTGGGGGGAAACTGTGTGTGGGGTTTGTGTGT<br>GTGGGTGCGGGGGGGGAAACTTTGTTTTGTCGGTGGTGTGTGTGTGGAGGGTTGTTGTTGGCGCGCCGCGTG<br>TGTGTAATGTTTTTTGGGGGGGGAGTTTATTTTTGGTGGGTGGTGGTGTGTGTGCGTGCGTGTGTGTGTGTTTTGTTTT<br>GGGGGGGGTTTTCCCCCTTTGTTGCTGCTGTTTTTTGTTCCCCCTCCCCTGTGTGTGTGTGTGTTTGTGCCTTTT<br>CTTGTTTGTGTGTGCCCCCTCCCCTGTTTTTTGTGTTTGTGTGT |
| GT_210_nt_rc              | <u>GTATTAATCAAGATCTAACAACAACCCTCCACACACAACACCACCGACAAAACAAAGTTTCCCCCCCCGCACCCA</u><br>CACAAACAACCCACACACAGTTTCCCCCAAAGGGGGAACTCTCCCCTACGCACGCACAAAGGGGGGAAGC<br>ACACACACGGGAGAAAGAACAACAACATTTTCTTCGCCCCACACACAAAAAAGACGAAAAAAGCACCACACA<br>CAC <u>GGCGCGCCTACGGCCGG</u>                                                                                                                                                                                |
| GT_416_nt_rc              | <u>GTATTAATCAAGATCTACAAACAACACAAAAACAGGGGAGGGGGACACACAAACAAGAAAAGGGCACAACA</u><br>CACACACACACAGGGGAGGGGGAACAACAAAAACAGCAGCAACAAGGGGGAAACCCCCCAAAAACAACAC<br>GCACGCACACACACACCACCACCACCAAAAAATAAACTCCCCCCCCAAAAACATTACACACACGCGGGCGCGC                                                                                                                                                                                                                   |

CAACAACAACCCTCCACACACAACACCACCGACAAAACAAAGTTTCCCCCCCCGCACCCACACAAACAAACCCC  
ACACACAGTTTCCCCCAAAGGGGGAAGTCTCCCCCTACGCACGCACAAAGGGGGAAGCACACACACGGGAGA  
AAGAACAACAAACATTTTCTTCGCCCCACACACAAAAAAGACGAAAAAAGCACCACACACACGGCCGGCCGA  
TCTCCCTATCA

**pCW24v4 background**

rRNA\_promoter AGTCGTATTAATCAGGTACCTCCCTATCAGTGATAGAGATCTCCCTATCAGTGATAGAGATTAGCTTTCCACCCA  
GCGCGGGTGCATTCTGGCTCTTATATACTTATTGTCATGACAGAGTATATTGACTGTGTTGATAAGGGACGG  
GTAAGTGTATTGAAGAGCCGATGCTTTTGACATGTTAGATATAATATGTTTTATTGTAAGTCAATACAACACACAA  
TAGGATAATAATGATAAAGTTAAAAAAGTATATATAGTAATAGAAATATATCTTATATAGGAAAGATTAAGCAGTAA  
AAGTAGCGCTTACGGCGTACGGTCCCTGAGTACTGAGTTTAAACATGTTCTCGTCCCGGGCTGCACGCGCCT

no\_promoter AGTCGTATTAATCAGGTACCTCCCTATCAGTGATAGAGATCTCCCTATCAGTGATAGAGATTAGCCCTGAGTACT  
GAGTTTAAACATGTTCTCGTCCCGGGCTGCACGCGCCT

GT\_210\_nt GCCCCGGTACGGGAGATCCCCTATAGTGAGTCGTATTAATCAAGATCTTCCCTATCAGTGATAGAGATCTCCCT  
ATCAGTGATAGAGATGTGTGTGTGGTGCCTTTTTTCGTCTTTTTTTGTGTGTGGGGCGAAGAAAATGTTTGTTGT  
CTTTCTCCCGTGTGTGTGCTTCCCCCTTTGTGCGTGCGTAGGGGGAGAGTTCCCCCTTTGGGGGGAACTGTGT  
GTGGGTTTGTGTGTGGTGCGGGGGGGAACTTTGTTTTGTGCGTGGTGTGTGTGTGGAGGGTTGTTGT  
TGCGCGCCTACGGCCGGCCTGAGTACTGAGTTTAAACATGTTCTCGTCCCGGGCTGCACGCGCCT

GT\_206\_nt GTTGTTGTTGGCGCGCCGCGTGTGTGTAATGTTTTTTGGGGGGGAGTTTATTTTTTGGTGGGTGGTGGTGTGT  
GTGTGCGTGCCTGTTTTGTTTTGGGGGGGTTTTCCCCCTTTGTTGCTGCTGTTTTTTGTTCCCCCTCCCCTGTG  
TGTGTGTGTTTTGTGCCCTTTTCTGTTTGTGTGTCCCCCTCCCCTGTTTTTTGTGTTTGTGGCCGGCCTG  
AGTACTGAGTT

fused GT\_416\_nt GTGTGTGTGGTGCCTTTTTTCGTCTTTTTTTGTGTGTGGGGCGAAGAAAATGTTTGTGTTGTTCTTTCTCCCGTGTGT  
GTGCTTCCCCCTTTGTGCGTGCGTAGGGGGAGAGTTCCCCCTTTGGGGGGAACTGTGTGTGGGTTTGTGTTGT  
GTGGTGCGGGGGGGAACTTTGTTTTGTGCGTGGTGTGTGTGTGGAGGGTTGTTGTTGGCGCGCCGCGTG  
TGTGTAATGTTTTTTGGGGGGGAGTTTATTTTTTGGTGGTGGTGGTGTGTGTGTGCGTGCCTGTTTTGTTTT  
GGGGGGGTTTTCCCCCTTTGTTGCTGCTGTTTTTTGTTCCCCCTCCCCTGTGTGTGTGTGTTTGTGCCCTTT  
CTTGTGTTGTGTGTCCCCCTCCCCTGTTTTTTGTGTTTGTGTTTGT

|              |                                                                                                                                                                                                                                                                                                                                                                                                                                                                                                     |
|--------------|-----------------------------------------------------------------------------------------------------------------------------------------------------------------------------------------------------------------------------------------------------------------------------------------------------------------------------------------------------------------------------------------------------------------------------------------------------------------------------------------------------|
| GT_210_nt_rc | <u>GTATTAATCAAGATCTTCCCTATCAGTGATAGAGATCTCCCTATCAGTGATAGAGATAACAACAACCCTCCACACA</u><br>CAACACCACCGACAAAACAAAGTTTCCCCCCCCGCACCCACACAAACAAACCCACACACAGTTTCCCCC<br>GGGGAACTCTCCCCTACGCACGCACAAAGGGGGAAGCACACACACGGGAGAAAGAACAACAAACATTTTC<br>TTCGCCCCACACACAAAAAAGACGAAAAAAGCACCACACACACGGCGCGCCTACGGCCGG                                                                                                                                                                                              |
| GT_416_nt_rc | <u>GTATTAATCAAGATCTACAAACAAACACAAAAACAGGGGAGGGGGACACACAAACAAGAAAAGGGCACAACA</u><br>CACACACACACAGGGGAGGGGGAACAAAAACAGCAGCAACAAAGGGGGAAACCCCCCCCCAAAAACAAACAC<br>GCACGCACACACACACCACCACCCACCAAAAAATAAACTCCCCCCCCAAAAACATTACACACACGCGGCGCGC<br>CAACAACAACCCTCCACACACAACACCACCGACAAAACAAAGTTTCCCCCCCCGCACCCACACAAACAAACCCC<br>ACACACAGTTTCCCCCAAAGGGGGAAGTCTCCCCCTACGCACGCACAAAGGGGGAAGCACACACACGGGAGA<br>AAGAACAACAACATTTTCTTCGCCCCACACACAAAAAAGACGAAAAAAGCACCACACACACGGCCGGCCGA<br><u>TCTCCCTATCA</u> |

underscored sequences indicate InFusion overhangs
